# Supplementary material for: HIV Prevention Messages Targeting Young Latino Immigrant MSM
Source: AIDS Res Treat. 2014 Apr 17;2014:353092. doi: 10.1155/2014/353092 (PMC4016876; doi:10.1155/2014/353092)
Supplement: Supplementary file 1 — Integrated IMB constructs measure attitudes, beliefs, norms and self-efficacy associated with HIV testing. These constructs assess whether attitudes and beliefs are positive or negative. For each construct, a scale score is computed by taking the mean of the items measuring the construct. [file 353092.f1.pdf]

## Evaluation of HIV Testing Intentions

### A. MC Intention

1. How likely are you to get tested for HIV in the next month?

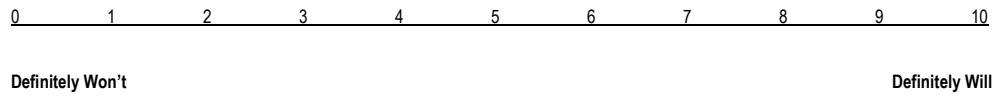

## B. Attitude

1. Getting tested for HIV in the next month would be:

[illegible]

*Next are some statements about getting tested for HIV. Please tell me how strongly you agree or disagree with each statement.*

|                      |                      |                      |                |                   |
|----------------------|----------------------|----------------------|----------------|-------------------|
| Strongly<br>Disagree | Somewhat<br>Disagree | Neither<br>/not sure | Somewhat Agree | Strongly<br>Agree |
| 1                    | 2                    | 3                    | 4              | 5                 |

- ### E. Self-Efficacy

Certain

I Could Not \_\_\_\_\_ : \_\_\_\_\_ : \_\_\_\_\_ : \_\_\_\_\_ : \_\_\_\_\_ I Could

extremely      quite      neither      quite      extremely

For each of the following questions, please tell me how certain you are that you could get an HIV test in the next month under various circumstances.

|  | Extremely<br>certain I<br>could not | Quite certain I<br>could not | Neither<br>/not sure | Quite certain<br>I could | Extremely<br>certain I could |
|--|-------------------------------------|------------------------------|----------------------|--------------------------|------------------------------|
|  | 1                                   | 2                            | 3                    | 4                        | 5                            |

  

|                                                                                                                   |                          |                          |                          |                          |                          |
|-------------------------------------------------------------------------------------------------------------------|--------------------------|--------------------------|--------------------------|--------------------------|--------------------------|
| a. How certain are you that you could get tested for HIV at your local clinic?                                    | <input type="checkbox"/> |
| b. How certain are you that you could get tested at an HIV testing center                                         | <input type="checkbox"/> |
| c. How certain are you that you could get tested at home, using a kit?                                            |                          |                          |                          |                          |                          |
| d. If you feel fear about your HIV test results, how certain are you that you could be tested for HIV?            | <input type="checkbox"/> |
| e. If you have to pay to be tested, how certain are you that you could be tested for HIV?                         | <input type="checkbox"/> |
| f. If you are concerned about what other people might say, how certain are you that you could get tested for HIV? | <input type="checkbox"/> |

#### F. Injunctive Norm

Next are questions about some people or things in your life that may or may not encourage you to get an HIV test.

- How strongly do you agree or disagree that each of the following people or things would encourage you to get an HIV test?

|  | Strongly<br>Disagree | Somewhat<br>Disagree | Neither<br>/not sure | Somewhat Agree | Strongly<br>Agree |
|--|----------------------|----------------------|----------------------|----------------|-------------------|
|  | 1                    | 2                    | 3                    | 4              | 5                 |

  

|                                         |                          |                          |                          |                          |                          |
|-----------------------------------------|--------------------------|--------------------------|--------------------------|--------------------------|--------------------------|
| a. Most people who are important to you | <input type="checkbox"/> |
| b. People in your community             | <input type="checkbox"/> |

|                                    | Strongly<br>Disagree     | Somewhat<br>Disagree     | Neither<br>/not sure     | Somewhat Agree           | Strongly<br>Agree        |
|------------------------------------|--------------------------|--------------------------|--------------------------|--------------------------|--------------------------|
|                                    | 1                        | 2                        | 3                        | 4                        | 5                        |
| c. Your family                     | <input type="checkbox"/> |
| d. Your best friend                | <input type="checkbox"/> |
| e. [Add other important referents] | <input type="checkbox"/> |
